# Supplementary material for: Evolutionary history determines how plant productivity responds to phylogenetic diversity and species richness
Source: PeerJ. 2014 Mar 13;2:e288. doi: 10.7717/peerj.288 (PMC3961147; doi:10.7717/peerj.288)
Supplement: Supplemental Information 1 — Data supporting the paper’s conclusions, made available for public use. [file peerj-02-288-s001.xlsx]

## Sheet: Sheet1
Pot Number	Species Identity	Species Richness	Subgenus	Phylogenetic Diversity Level	Height (cm)	Stem Diameter (mm)	Survival (1=alive)	Biomass (g) (allometric estimate)
1	E. pulchella	1	E	1	66.8	6.95	1	15.6017
1	E. pulchella	1	E	1	61.5	5.67	1	12.7099
1	E. pulchella	1	E	1	47.1	4.52	1	9.95374
1	E. pulchella	1	E	1	55	5.05	1	11.2399
1	E. pulchella	1	E	1	55.5	6.45	1	14.2445
1	E. pulchella	1	E	1	73.7	7.43	1	16.8259
10	E. rodwayii	1	S	1	12.2	1.17	1	2.47451
10	E. rodwayii	1	S	1	77.2	5.52	1	12.7307
10	E. rodwayii	1	S	1	5.2	0.71	1	1.47135
10	E. rodwayii	1	S	1	7.6	1.19	1	2.46417
10	E. rodwayii	1	S	1	71.3	4	1	9.29053
10	E. rodwayii	1	S	1	50.8	3.63	1	8.13249
11	E. rubida	1	S	1			0
11	E. rubida	1	S	1	46.9	3.53	1	7.85378
11	E. rubida	1	S	1	58.9	4.77	1	10.7195
11	E. rubida	1	S	1	58	4.53	1	10.1867
11	E. rubida	1	S	1	65	4.98	1	11.2957
11	E. rubida	1	S	1	56.7	4.55	1	10.2042
12	E. rubida	1	S	1	62.6	4.71	1	10.6642
12	E. rubida	1	S	1	57.6	5.23	1	11.6797
12	E. rubida	1	S	1	60.5	3.47	1	7.95489
12	E. rubida	1	S	1	64	5.55	1	12.5064
12	E. rubida	1	S	1	64.7	6.36	1	14.2728
12	E. rubida	1	S	1			0
13	E. subcrenulata	1	S	1	44.2	4.67	1	10.2141
13	E. subcrenulata	1	S	1	74.3	5.93	1	13.5633
13	E. subcrenulata	1	S	1	40.3	3.33	1	7.32193
13	E. subcrenulata	1	S	1	54.1	4.11	1	9.21409
13	E. subcrenulata	1	S	1	24.6	2.4	1	5.14686
13	E. subcrenulata	1	S	1	33.2	3.72	1	8.01768
14	E. subcrenulata	1	S	1	60.3	6.07	1	13.5435
14	E. subcrenulata	1	S	1	56.7	5.49	1	12.2175
14	E. subcrenulata	1	S	1	45.9	3.49	1	7.75227
14	E. subcrenulata	1	S	1	43.8	4.36	1	9.5522
14	E. subcrenulata	1	S	1	53.7	5.5	1	12.1733
14	E. subcrenulata	1	S	1	31.4	2.89	1	6.26121
15	E. barberi	1	S	1	9.2	1.21	1	2.52235
15	E. barberi	1	S	1	13.8	1.84	1	3.85526
15	E. barberi	1	S	1	16.5	1.13	1	2.44026
15	E. barberi	1	S	1	47.9	3.67	1	8.16747
15	E. barberi	1	S	1	45.7	2.83	1	6.3535
15	E. barberi	1	S	1	42.6	3.37	1	7.44397
16	E. barberi	1	S	1	63.4	3.75	1	8.60792
16	E. barberi	1	S	1	40.9	3.97	1	8.67722
16	E. barberi	1	S	1	65.7	5.07	1	11.5049
16	E. barberi	1	S	1	20.4	1.84	1	3.93908
16	E. barberi	1	S	1	75	5.39	1	12.3981
16	E. barberi	1	S	1	8.5	1.66	1	3.42413
17	E. viminalis	1	S	1	36.6	2.79	1	6.13174
17	E. viminalis	1	S	1	77.5	6.28	1	14.4045
17	E. viminalis	1	S	1	69.1	5.05	1	11.5321
17	E. viminalis	1	S	1	67.5	5.27	1	11.9761
17	E. viminalis	1	S	1	67.9	5.98	1	13.5251
17	E. viminalis	1	S	1	51	3.13	1	7.07217
18	E. viminalis	1	S	1	41.3	2.45	1	5.48749
18	E. viminalis	1	S	1	67.1	5.9	1	13.3332
18	E. viminalis	1	S	1	71.5	5.77	1	13.1505
18	E. viminalis	1	S	1	81.4	6.52	1	15.0262
18	E. viminalis	1	S	1	63.5	7.16	1	15.971
18	E. viminalis	1	S	1	55.6	4.56	1	10.2042
19	E. cordata	1	S	1	56.3	3.82	1	8.63369
19	E. cordata	1	S	1	64.5	4.92	1	11.1558
19	E. cordata	1	S	1	54.2	4.15	1	9.30134
19	E. cordata	1	S	1	48.9	4.29	1	9.50054
19	E. cordata	1	S	1	58.5	4.59	1	10.3251
19	E. cordata	1	S	1	50.1	3.51	1	7.86544
2	E. pulchella	1	E	1	62.7	4.71	1	10.6662
2	E. pulchella	1	E	1	56.1	4.69	1	10.4922
2	E. pulchella	1	E	1	76.3	6.82	1	15.5589
2	E. pulchella	1	E	1	71.4	5.78	1	13.1701
2	E. pulchella	1	E	1	77.2	6.44	1	14.7482
2	E. pulchella	1	E	1	63.3	4.99	1	11.2824
20	E. cordata	1	S	1	47	3.8	1	8.4272
20	E. cordata	1	S	1	58.7	4.92	1	11.0375
20	E. cordata	1	S	1	51.1	4.18	1	9.3079
20	E. cordata	1	S	1	40.5	3.49	1	7.66141
20	E. cordata	1	S	1	66.3	4.32	1	9.89307
20	E. cordata	1	S	1	63.8	4.68	1	10.6232
21	E. dalrympleana	1	S	1	84.5	5.63	1	13.1338
21	E. dalrympleana	1	S	1	67.7	5.82	1	13.1734
21	E. dalrympleana	1	S	1	64.3	4.71	1	10.698
21	E. dalrympleana	1	S	1	40.6	3.28	1	7.22178
21	E. dalrympleana	1	S	1	66.8	6.06	1	13.6731
21	E. dalrympleana	1	S	1	63.1	4.12	1	9.40104
22	E. dalrympleana	1	S	1	52.9	4.77	1	10.5993
22	E. dalrympleana	1	S	1	56.8	5.08	1	11.3414
22	E. dalrympleana	1	S	1	56.5	3.68	1	8.33745
22	E. dalrympleana	1	S	1	49	4.79	1	10.5637
22	E. dalrympleana	1	S	1	51.4	3.81	1	8.52593
22	E. dalrympleana	1	S	1	63.1	5.27	1	11.8825
23	E. globulus	1	S	1	76.5	7.1	1	16.1775
23	E. globulus	1	S	1	55.4	4.56	1	10.2003
23	E. globulus	1	S	1	61.9	6.26	1	13.9901
23	E. globulus	1	S	1	64.1	5.72	1	12.8758
23	E. globulus	1	S	1	67.5	6.44	1	14.5135
23	E. globulus	1	S	1	69.7	6.24	1	14.1319
24	E. globulus	1	S	1	57.5	6.56	1	14.5288
24	E. globulus	1	S	1	60.7	5.02	1	11.2935
24	E. globulus	1	S	1	55.5	6.19	1	13.6884
24	E. globulus	1	S	1	30.6	3.7	1	7.93091
24	E. globulus	1	S	1	55.3	5.61	1	12.4435
24	E. globulus	1	S	1	67.7	6.72	1	15.1257
25	E. johnstonii	1	S	1	35.1	4.02	1	8.67707
25	E. johnstonii	1	S	1	60.8	6.63	1	14.7602
25	E. johnstonii	1	S	1	33.5	4.29	1	9.21064
25	E. johnstonii	1	S	1	44.1	4.54	1	9.93774
25	E. johnstonii	1	S	1	46.5	4.5	1	9.89977
25	E. johnstonii	1	S	1	46.3	5.55	1	12.1174
26	E. johnstonii	1	S	1	45.2	5.37	1	11.7129
26	E. johnstonii	1	S	1	61.2	7.25	1	16.105
26	E. johnstonii	1	S	1	32.3	3.29	1	7.1073
26	E. johnstonii	1	S	1	10.6	1.3	1	2.72031
26	E. johnstonii	1	S	1	15.3	1.9	1	3.99661
26	E. johnstonii	1	S	1	54.9	6.27	1	13.8452
27	E. pauciflora	1	E	1	26.9	2.63	1	5.65476
27	E. pauciflora	1	E	1	59.1	5.17	1	11.5826
27	E. pauciflora	1	E	1	60.1	4.35	1	9.8404
27	E. pauciflora	1	E	1			0
27	E. pauciflora	1	E	1	35	2.94	1	6.42075
27	E. pauciflora	1	E	1	63.6	5.82	1	13.0805
28	E. pauciflora	1	E	1	64.7	5.79	1	13.0406
28	E. pauciflora	1	E	1	70.8	5.66	1	12.8953
28	E. pauciflora	1	E	1	67	5.72	1	12.9408
28	E. pauciflora	1	E	1	19.4	1.77	1	3.78299
28	E. pauciflora	1	E	1	59.7	5.53	1	12.3689
28	E. pauciflora	1	E	1	70.5	6.32	1	14.3249
29	E. coccifera	1	E	1	32.1	3.02	1	6.54237		EXCLUDED - all E. coccifera excluded due to mislabeled seed source.
29	E. coccifera	1	E	1	43.3	5.6	1	12.1569		EXCLUDED
29	E. coccifera	1	E	1	49.6	4.96	1	10.9368		EXCLUDED
29	E. coccifera	1	E	1	40.2	5.68	1	12.2565		EXCLUDED
29	E. coccifera	1	E	1	51.7	6.16	1	13.535		EXCLUDED
29	E. coccifera	1	E	1	30.1	4.41	1	9.39566		EXCLUDED
3	E. gunnii	1	S	1	51.6	5.59	1	12.3191
3	E. gunnii	1	S	1	51	4.8	1	10.6251
3	E. gunnii	1	S	1	48	4.15	1	9.1868
3	E. gunnii	1	S	1	52.1	6.18	1	13.587
3	E. gunnii	1	S	1	46.6	4.56	1	10.0287
3	E. gunnii	1	S	1	67.1	5.44	1	12.3361
30	E. coccifera	1	E	1	49.1	5.05	1	11.1176		EXCLUDED
30	E. coccifera	1	E	1	45	4.77	1	10.4411		EXCLUDED
30	E. coccifera	1	E	1	46.8	5.09	1	11.1546		EXCLUDED
30	E. coccifera	1	E	1	50	4.71	1	10.4138		EXCLUDED
30	E. coccifera	1	E	1	55.9	5.35	1	11.9005		EXCLUDED
30	E. coccifera	1	E	1	39.3	4.2	1	9.13098		EXCLUDED
31	E. sieberi	1	E	1			0
31	E. sieberi	1	E	1	73.7	8.33	1	18.7918
31	E. sieberi	1	E	1	71.6	6.13	1	13.9372
31	E. sieberi	1	E	1	47.8	4.32	1	9.54342
31	E. sieberi	1	E	1	63.5	7.95	1	17.6764
31	E. sieberi	1	E	1	20.9	2.74	1	5.79246
32	E. sieberi	1	E	1	61.6	8.02	1	17.774
32	E. sieberi	1	E	1	64.5	7.04	1	15.7377
32	E. sieberi	1	E	1	61.3	7.53	1	16.7105
32	E. sieberi	1	E	1	37.2	3.03	1	6.64311
32	E. sieberi	1	E	1	65.7	7.2	1	16.1148
32	E. sieberi	1	E	1	61.6	8.47	1	18.7433
33	E. brookeriana	1	S	1	35.2	2.76	1	6.048
33	E. brookeriana	1	S	1	50.8	4.56	1	10.1106
33	E. brookeriana	1	S	1	73.3	7.74	1	17.4921
33	E. brookeriana	1	S	1	66.8	7.01	1	15.7317
33	E. brookeriana	1	S	1	55	4.3	1	9.63675
33	E. brookeriana	1	S	1	79.7	6.77	1	15.5345
34	E. brookeriana	1	S	1	79.9	7.31	1	16.7274
34	E. brookeriana	1	S	1	70	6.19	1	14.0303
34	E. brookeriana	1	S	1	80	6.21	1	14.31
34	E. brookeriana	1	S	1	72.7	5.67	1	12.9594
34	E. brookeriana	1	S	1	79.9	6.38	1	14.6816
34	E. brookeriana	1	S	1	77.6	5.87	1	13.5073
35	E. delegatensis	1	E	1	41	4.01	1	8.76313
35	E. delegatensis	1	E	1	60.1	6.46	1	14.3774
35	E. delegatensis	1	E	1	24.6	4.08	1	8.61018
35	E. delegatensis	1	E	1	51.2	7.08	1	15.481
35	E. delegatensis	1	E	1	45.3	6.09	1	13.2366
35	E. delegatensis	1	E	1	48.4	6.07	1	13.2665
36	E. delegatensis	1	E	1	48.4	6.07	1	13.2665
36	E. delegatensis	1	E	1	55.6	5.79	1	12.8352
36	E. delegatensis	1	E	1	65.9	9.25	1	20.5577
36	E. delegatensis	1	E	1	64.7	8.27	1	18.4017
36	E. delegatensis	1	E	1	61.3	7.69	1	17.055
36	E. delegatensis	1	E	1	31.4	4.66	1	9.94015
37	E. nitida	1	E	1	16.4	2.17	1	4.56181
37	E. nitida	1	E	1	86.1	7.72	1	17.7991
37	E. nitida	1	E	1	64.1	6.22	1	13.956
37	E. nitida	1	E	1	64.6	6.35	1	14.2488
37	E. nitida	1	E	1	70	5.31	1	12.1163
37	E. nitida	1	E	1	82.3	7.41	1	17.0112
38	E. nitida	1	E	1	54.1	5.07	1	11.2639
38	E. nitida	1	E	1	79.8	7.55	1	17.2526
38	E. nitida	1	E	1	77	5.6	1	12.9017
38	E. nitida	1	E	1	72.2	4.76	1	10.964
38	E. nitida	1	E	1	55.4	4.14	1	9.30213
38	E. nitida	1	E	1	66.7	5.5	1	12.4574
39	E. obliqua	1	E	1	49.3	5.55	1	12.1834
39	E. obliqua	1	E	1	31.7	2.67	1	5.80837
39	E. obliqua	1	E	1	37	3.44	1	7.4979
39	E. obliqua	1	E	1	22.9	2.3	1	4.91716
39	E. obliqua	1	E	1	45.2	4.41	1	9.68445
39	E. obliqua	1	E	1	59.4	6.25	1	13.9093
4	E. gunnii	1	S	1	56.5	6.02	1	13.348
4	E. gunnii	1	S	1	52.9	5.2	1	11.5162
4	E. gunnii	1	S	1	47.6	4.59	1	10.1118
4	E. gunnii	1	S	1	59.7	5.96	1	13.2931
4	E. gunnii	1	S	1	48.3	5.07	1	11.1434
4	E. gunnii	1	S	1	65.7	6.47	1	14.5349
40	E. obliqua	1	E	1	27.5	2.88	1	6.18075
40	E. obliqua	1	E	1	24.6	3.21	1	6.81668
40	E. obliqua	1	E	1	47.4	5.65	1	12.3535
40	E. obliqua	1	E	1	22.9	2.13	1	4.56743
40	E. obliqua	1	E	1			0
40	E. obliqua	1	E	1	53.5	5.53	1	12.233
41	E. ovata	1	S	1	7.3	0.97	1	2.01683
41	E. ovata	1	S	1	45.9	4.17	1	9.1903
41	E. ovata	1	S	1	68.4	5.56	1	12.6248
41	E. ovata	1	S	1	60.8	4.94	1	11.1234
41	E. ovata	1	S	1	51.1	4.73	1	10.4782
41	E. ovata	1	S	1	71.2	5.71	1	13.0131
42	E. ovata	1	S	1	68	6.3	1	14.2218
42	E. ovata	1	S	1	51.5	5.75	1	12.6575
42	E. ovata	1	S	1	60.1	6.04	1	13.4743
42	E. ovata	1	S	1	27.2	4.85	1	10.2501
42	E. ovata	1	S	1	69.6	6.09	1	13.8034
42	E. ovata	1	S	1	11.6	1.38	1	2.89398
43	E. tenuiramis	1	E	1	56	4.93	1	11.0038
43	E. tenuiramis	1	E	1	54.3	3.81	1	8.57704
43	E. tenuiramis	1	E	1	50.5	4.61	1	10.2111
43	E. tenuiramis	1	E	1	68	4.36	1	10.012
43	E. tenuiramis	1	E	1	62.7	5.43	1	12.219
43	E. tenuiramis	1	E	1	44.9	4.27	1	9.383
44	E. tenuiramis	1	E	1	64	4.63	1	10.5192
44	E. tenuiramis	1	E	1	46.7	3.09	1	6.91903
44	E. tenuiramis	1	E	1	49.1	4.92	1	10.8416
44	E. tenuiramis	1	E	1	66.4	4.96	1	11.2812
44	E. tenuiramis	1	E	1	66.7	6.04	1	13.6274
44	E. tenuiramis	1	E	1	64.9	5.15	1	11.6613
45	E. risdonii	1	E	1	36.1	3.31	1	7.21114
45	E. risdonii	1	E	1			0
45	E. risdonii	1	E	1	71.2	7.02	1	15.8663
45	E. risdonii	1	E	1	61.9	6.42	1	14.3349
45	E. risdonii	1	E	1	20.2	2.18	1	4.63371
45	E. risdonii	1	E	1	56.8	4.44	1	9.97056
46	E. risdonii	1	E	1	23.7	2.81	1	5.97846
46	E. risdonii	1	E	1	28.1	2.5	1	5.40323
46	E. risdonii	1	E	1	15.7	1.69	1	3.5735
46	E. risdonii	1	E	1	44.9	4.84	1	10.587
46	E. risdonii	1	E	1	61.4	4.58	1	10.3604
46	E. risdonii	1	E	1	21.8	2.92	1	6.17572
47	E. vernicosa	1	S	1	5.3	1.66	1	3.38492
47	E. vernicosa	1	S	1	7	1.54	1	3.16365
47	E. vernicosa	1	S	1	12	2.32	1	4.8068
47	E. vernicosa	1	S	1	9.1	1.56	1	3.2292
47	E. vernicosa	1	S	1	8.2	2.25	1	4.61254
47	E. vernicosa	1	S	1	4.9	0.97	1	1.99157
48	E. vernicosa	1	S	1	11.7	1.92	1	3.99093
48	E. vernicosa	1	S	1	8.4	1.85	1	3.80689
48	E. vernicosa	1	S	1	3.7	1.28	1	2.60181
48	E. vernicosa	1	S	1	8.5	1.05	1	2.19116
48	E. vernicosa	1	S	1	11.8	2.18	1	4.51989
48	E. vernicosa	1	S	1	5.3	1.46	1	2.98228
49	E. amygdalina	1	E	1	75.5	7.85	1	17.7932
49	E. amygdalina	1	E	1	88.6	8.31	1	19.1783
49	E. amygdalina	1	E	1	61.3	7.87	1	17.4426
49	E. amygdalina	1	E	1	66	7.62	1	17.0319
49	E. amygdalina	1	E	1	68.1	6.62	1	14.9187
49	E. amygdalina	1	E	1	60.1	6.04	1	13.4743
5	E. urnigera	1	S	1	61.1	5.65	1	12.6579
5	E. urnigera	1	S	1	55.5	6.5	1	14.3514
5	E. urnigera	1	S	1	36.4	2.67	1	5.87781
5	E. urnigera	1	S	1	53.2	5.56	1	12.2904
5	E. urnigera	1	S	1	51.3	3.92	1	8.75827
5	E. urnigera	1	S	1	32	3.37	1	7.2688
50	E. amygdalina	1	E	1	46	4.6	1	10.1016
50	E. amygdalina	1	E	1	52.7	4.4	1	9.80657
50	E. amygdalina	1	E	1	34.6	3.31	1	7.18658
50	E. amygdalina	1	E	1	49.8	7.16	1	15.6148
50	E. amygdalina	1	E	1	65.9	6.66	1	14.951
50	E. amygdalina	1	E	1	78.3	9.54	1	21.5817
51	E. regnans	1	E	1	11.2	1.71	1	3.5586
51	E. regnans	1	E	1	52.9	4.65	1	10.3435
51	E. regnans	1	E	1	59.2	5.94	1	13.2386
51	E. regnans	1	E	1	82.9	8.74	1	19.9629
51	E. regnans	1	E	1	76.6	0.364	1	1.41817
51	E. regnans	1	E	1	49	0.237	1	0.899933
52	E. regnans	1	E	1	67.8	6.99	1	15.714
52	E. regnans	1	E	1	77.9	7.61	1	17.333
52	E. regnans	1	E	1	23.3	2.65	1	5.64309
52	E. regnans	1	E	1	72.5	7.59	1	17.1429
52	E. regnans	1	E	1	15.5	1.74	1	3.67298
52	E. regnans	1	E	1	60.2	5.65	1	12.6379
53	E. perriniana	1	S	1	33.5	2.3	1	5.06398
53	E. perriniana	1	S	1	51.3	2.82	1	6.4172
53	E. perriniana	1	S	1	45.1	3.86	1	8.52052
53	E. perriniana	1	S	1	42.8	3.43	1	7.57369
53	E. perriniana	1	S	1	55.5	3.51	1	7.95656
53	E. perriniana	1	S	1			0
54	E. perriniana	1	S	1	25	2.27	1	4.88438
54	E. perriniana	1	S	1			0
54	E. perriniana	1	S	1	61.8	3.92	1	8.94622
54	E. perriniana	1	S	1	15.6	1.64	1	3.47032
54	E. perriniana	1	S	1	60.8	3.75	1	8.56248
54	E. perriniana	1	S	1			0
55	E. radiata	1	E	1	55.3	3.67	1	8.29531
55	E. radiata	1	E	1	79.8	6.66	1	15.295
55	E. radiata	1	E	1	54	5.08	1	11.2832
55	E. radiata	1	E	1	36.8	3.43	1	7.47364
55	E. radiata	1	E	1	59.2	4.98	1	11.1766
55	E. radiata	1	E	1	49.4	4.27	1	9.46748
56	E. radiata	1	E	1	82	6.75	1	15.548
56	E. radiata	1	E	1	79.6	5.65	1	13.0691
56	E. radiata	1	E	1	80.2	5.6	1	12.9724
56	E. radiata	1	E	1	67.5	6.43	1	14.4918
56	E. radiata	1	E	1	75.2	4.66	1	10.8052
56	E. radiata	1	E	1	96.7	5.97	1	14.1665
59	E. cordata	3	S	2	67.6	6.24	1	14.0821
59	E. cordata	3	S	2	59.3	4.53	1	10.2119
59	E. ovata	3	S	2	60.6	6.09	1	13.5935
59	E. ovata	3	S	2	60.5	5.3	1	11.8917
59	E. viminalis	3	S	2	77.3	5.84	1	13.4347
59	E. viminalis	3	S	2	65.7	5.51	1	12.4572
6	E. urnigera	1	S	1	47.3	4.53	1	9.9788
6	E. urnigera	1	S	1	48.5	4.75	1	10.4688
6	E. urnigera	1	S	1	40.3	3.25	1	7.15387
6	E. urnigera	1	S	1	62.9	4.8	1	10.8643
6	E. urnigera	1	S	1	62.4	5.99	1	13.4199
6	E. urnigera	1	S	1	60.6	4.9	1	11.0332
60	E. brookeriana	3	S	2	36.1	3.26	1	7.10663
60	E. brookeriana	3	S	2	87.4	7.22	1	16.7255
60	E. globulus	3	S	2	82.6	5.99	1	13.886
60	E. globulus	3	S	2	70.4	6.88	1	15.5411
60	E. viminalis	3	S	2	88	8.1	1	18.6948
60	E. viminalis	3	S	2	77.8	7.19	1	16.4086
61	E. dalrympleana	3	S	2	56.6	4.12	1	9.28144
61	E. dalrympleana	3	S	2	66.3	5.76	1	13.0117
61	E. perriniana	3	S	2	55.2	4.02	1	9.04188
61	E. perriniana	3	S	2	54.5	3.49	1	7.89696
61	E. subcrenulata	3	S	2	51.6	5.68	1	12.5107
61	E. subcrenulata	3	S	2	52.7	5.17	1	11.448
62	E. delegatensis	3	E	2	53.8	5.43	1	12.0261
62	E. delegatensis	3	E	2	53.9	5.8	1	12.8181
62	E. pauciflora	3	E	2	55.7	4.08	1	9.17931
62	E. pauciflora	3	E	2	50.9	5.93	1	13.0269
62	E. regnans	3	E	2	54.6	6.17	1	13.6245
62	E. regnans	3	E	2	54.6	6.21	1	13.7099
63	E. obliqua	3	E	2	32.5	3.51	1	7.56844
63	E. obliqua	3	E	2	34.9	3.57	1	7.73417
63	E. pulchella	3	E	2	51.4	6.47	1	14.1877
63	E. pulchella	3	E	2	70.2	7.02	1	15.8406
63	E. sieberi	3	E	2	60.7	6.86	1	15.2527
63	E. sieberi	3	E	2	62.8	6.59	1	14.7233
64	E. coccifera	3	E	2	70.2	7.45	1	16.7761		EXCLUDED
64	E. coccifera	3	E	2	45.8	4.68	1	10.2668		EXCLUDED
64	E. pauciflora	3	E	2	45.4	5.09	1	11.1255
64	E. pauciflora	3	E	2	47.4	5.37	1	11.7603
64	E. regnans	3	E	2	47.9	4.67	1	10.2872
64	E. regnans	3	E	2	63.6	5.45	1	12.2817
65	E. rodwayii	3	S	2	78.6	7	1	16.0122
65	E. rodwayii	3	S	2			0
65	E. urnigera	3	S	2	50.3	4.37	1	9.69696
65	E. urnigera	3	S	2	54.7	4.71	1	10.5072
65	E. viminalis	3	S	2	67.4	5.14	1	11.692
65	E. viminalis	3	S	2	83.9	7.4	1	17.0317
66	E. ovata	3	S	3	67.8	5.54	1	12.5682
66	E. ovata	3	S	3	50.2	3.47	1	7.7821
66	E. risdonii	3	E	3	61.1	4.98	1	11.2156
66	E. risdonii	3	E	3	77.9	6.04	0	13.8873
66	E. sieberi	3	E	3	24.1	2.73	1	5.81969
66	E. sieberi	3	E	3	57.6	5.35	1	11.937
67	E. dalrympleana	3	S	3	61.2	5.2	1	11.6913
67	E. dalrympleana	3	S	3			0
67	E. pauciflora	3	E	3	46.7	4.92	1	10.7927
67	E. pauciflora	3	E	3	69.1	7.01	1	15.7907
67	E. perriniana	3	S	3	58.8	3.74	1	8.50606
67	E. perriniana	3	S	3	40.9	2.69	1	5.98634
68	E. dalrympleana	6	S	2	48.3	6.01	1	13.1369
68	E. gunnii	6	S	2	36.8	4.08	1	8.83344
68	E. perriniana	6	S	2	51.6	3.55	1	7.97591
68	E. subcrenulata	6	S	2	56.9	4.81	1	10.7651
68	E. urnigera	6	S	2	57.5	5.4	1	12.042
68	E. vernicosa	6	S	2	12.1	1.89	1	3.93518
69	E. dalrympleana	6	S	2	59.5	6.85	1	15.2009
69	E. gunnii	6	S	2	65.2	6.61	1	14.8255
69	E. johnstonii	6	S	2	53.6	5.43	1	12.0218
69	E. rodwayii	6	S	2	60.3	5.97	1	13.3284
69	E. subcrenulata	6	S	2	63.2	5.16	1	11.6472
69	E. vernicosa	6	S	2	15.2	3.15	1	6.54282
70	E. barberi	6	S	2	67.3	5.48	1	12.4271
70	E. brookeriana	6	S	2	77.5	7.85	1	17.8487
70	E. globulus	6	S	2	71.7	7.33	1	16.5547
70	E. ovata	6	S	2	65.8	6.24	1	14.0395
70	E. rubida	6	S	2	56.7	5.14	1	11.4679
70	E. viminalis	6	S	2	68.3	5.48	1	12.4489
71	E. amygdalina	6	E	2	47.3	4.59	1	10.1059
71	E. coccifera	6	E	2	69.6	5.82	1	13.2164		EXCLUDED
71	E. delegatensis	6	E	2	46.7	5.89	1	12.8459
71	E. obliqua	6	E	2	50.2	5.42	1	11.9268
71	E. pauciflora	6	E	2	72.1	7.7	1	17.3719
71	E. radiata	6	E	2	54.9	5.96	1	13.1827
72	E. amygdalina	6	E	2	73.7	9.98	1	22.3958
72	E. nitida	6	E	2	82.5	7.71	1	17.6784
72	E. pulchella	6	E	2	67.3	7.39	1	16.5685
72	E. risdonii	6	E	2	60.5	5.03	1	11.3108
72	E. sieberi	6	E	2			0
72	E. tenuiramis	6	E	2	67.1	5.31	1	12.0543
73	E. amygdalina	6	E	2	74.9	7.12	1	16.1799
73	E. nitida	6	E	2	66.8	4.83	1	11.0077
73	E. pulchella	6	E	2	64.1	4	1	9.16021
73	E. risdonii	6	E	2	56.5	5.17	1	11.5279
73	E. sieberi	6	E	2	40.9	4.07	1	8.88745
73	E. tenuiramis	6	E	2	54.4	3.89	1	8.74968
74	E. dalrympleana	6	S	3	69.7	5.09	1	11.6315
74	E. delegatensis	6	E	3			0
74	E. gunnii	6	S	3	51.9	6.09	1	13.3906
74	E. pulchella	6	E	3	78.2	6.13	1	14.0918
74	E. risdonii	6	E	3	51.1	4.77	1	10.5633
74	E. urnigera	6	S	3	38.9	4.55	1	9.85758
75	E. amygdalina	6	E	3	64.7	4.83	0	10.9653
75	E. coccifera	6	E	3	66	6.23	1	14.0226		EXCLUDED
75	E. globulus	6	S	3	76.4	8.38	1	18.9794
75	E. regnans	6	E	3	34.5	2.74	0	5.99578
75	E. risdonii	6	E	3	66.4	4.35	1	9.95994
75	E. rubida	6	S	3	60.6	4.83	1	10.8826
76	E. barberi	6	S	2	69.3	4.94	1	11.2972		Pot 76 - One plant died shortly following transplanting and was excluded.
76	E. dalrympleana	6	S	2	60.3	4.52	1	10.2098		These "early deaths" see also pots 88 and N2-6 are not included as they likely resulted from
76	E. ovata	6	S	2	63	7.07	1	15.7638		transplant shock and not ecological interactions.
76	E. rubida	6	S	2	51.5	5.55	1	12.2317
76	E. urnigera	6	S	2	53.1	5.83	1	12.864
77	E. obliqua	3	E	2	20.7	3.01	1	6.34344
77	E. obliqua	3	E	2	44.6	3.84	1	8.46942
77	E. regnans	3	E	2	47.1	5.21	1	11.415
77	E. regnans	3	E	2	52.8	5.31	1	11.7486
77	E. sieberi	3	E	2	55.9	5.33	1	11.8577
77	E. sieberi	3	E	2	69.7	5.74	1	13.0448
78	E. obliqua	3	E	2	36.9	4.71	1	10.1534
78	E. obliqua	3	E	2	53	5.19	1	11.497
78	E. regnans	3	E	2	53.7	4.76	1	10.594
78	E. regnans	3	E	2	68	6.82	1	15.3502
78	E. sieberi	3	E	2	35.6	5.23	1	11.2138
78	E. sieberi	3	E	2	70.5	7.42	1	16.7188
79	E. delegatensis	3	E	2	47.8	4.51	1	9.94613
79	E. delegatensis	3	E	2	67.6	7.01	1	15.7523
79	E. obliqua	3	E	2	45.7	5.2	1	11.3643
79	E. obliqua	3	E	2	62.1	4.84	1	10.9344
79	E. regnans	3	E	2	75	6.95	1	15.8106
79	E. regnans	3	E	2	52.2	5.58	1	12.311
80	E. pulchella	3	E	2	42.4	3.41	1	7.5249
80	E. pulchella	3	E	2	71	5.77	1	13.1393
80	E. radiata	3	E	2	60.2	4.69	1	10.5735
80	E. radiata	3	E	2	39.1	3.1	1	6.81973
80	E. tenuiramis	3	E	2	59	5.29	1	11.8382
80	E. tenuiramis	3	E	2	55.7	4.57	1	10.2275
81	E. coccifera	3	E	2	56.2	4.3	1	9.65937		EXCLUDED
81	E. coccifera	3	E	2	54.1	5.49	1	12.1607		EXCLUDED
81	E. nitida	3	E	2	66.5	4.45	0	10.1785
81	E. nitida	3	E	2	71.2	4.9	1	11.2489
81	E. pulchella	3	E	2	59.1	4.83	0	10.8523
81	E. pulchella	3	E	2	67.3	4.19	1	9.6301
82	E. amygdalina	3	E	2	57	5.24	0	11.6884
82	E. amygdalina	3	E	2	36.9	2.89	1	6.34549
82	E. pulchella	3	E	2	40.6	3.67	1	8.04137
82	E. pulchella	3	E	2	84.9	7.03	1	16.2398
82	E. risdonii	3	E	2	55.5	6.69	1	14.7578
82	E. risdonii	3	E	2	71.8	5.72	1	13.0483
83	E. barberi	3	S	2	62.8	6.3	1	14.0978
83	E. barberi	3	S	2	61.6	6.71	1	14.9523
83	E. ovata	3	S	2	63.9	8.15	1	18.1196
83	E. ovata	3	S	2	61.7	7.82	1	17.346
83	E. rodwayii	3	S	2			0
83	E. rodwayii	3	S	2	44.8	6	1	13.0349
84	E. barberi	3	S	2	58.2	3.74	1	8.49559
84	E. barberi	3	S	2	55.8	5.68	1	12.6043
84	E. ovata	3	S	2	61.8	5.44	1	12.2211
84	E. ovata	3	S	2	66.6	9.63	1	21.4029
84	E. rodwayii	3	S	2	51.1	4.89	1	10.8186
84	E. rodwayii	3	S	2	74.9	6.51	1	14.8457
85	E. barberi	3	S	2	33.9	2.9	1	6.32036
85	E. barberi	3	S	2	35.5	2.47	1	5.44676
85	E. brookeriana	3	S	2	79.1	7.41	1	16.926
85	E. brookeriana	3	S	2	77.7	8.4	1	19.0611
85	E. ovata	3	S	2	66.3	5.64	1	12.7519
85	E. ovata	3	S	2	65.4	5.37	1	12.1477
86	E. cordata	3	S	2	9.6	2.35	1	4.83416
86	E. cordata	3	S	2	72.4	6.81	1	15.439
86	E. dalrympleana	3	S	2	67.2	4.76	1	10.864
86	E. dalrympleana	3	S	2	11.7	2.55	1	5.26936
86	E. vernicosa	3	S	2	77.3	7.3	1	16.6369		EXCLUDED - Extraordinary traits relative to other E. vernicosa. Believed to be data collection error.
86	E. vernicosa	3	S	2	66.9	6.52	1	14.6724		EXCLUDED - Extraordinary traits relative to other E. vernicosa. Believed to be data collection error.
87	E. cordata	3	S	2	70.5	5.25	1	11.9964
87	E. cordata	3	S	2	49.1	5.06	1	11.1388
87	E. rubida	3	S	2	69.9	5.78	1	13.1362
87	E. rubida	3	S	2	72.4	5.61	1	12.8218
87	E. viminalis	3	S	2	68.6	6.25	1	14.1275
87	E. viminalis	3	S	2	63	5.44	1	12.2471
88	E. urnigera	3	S	2	65	8.18	1	18.2157		Pot 88 - Two plants died shortly following transplanting and were excluded.
88	E. urnigera	3	S	2	61.3	7.45	1	16.5382		These "early deaths" see also pots (76 and N2-6) are not included as they likely resulted from
88	E. vernicosa	3	S	2	13.6	2.78	1	5.76468		transplant shock and not ecological interactions.
88	E. vernicosa	3	S	2	15.5	2.13	1	4.46809
9	E. rodwayii	1	S	1	71	7.02	1	15.8612
9	E. rodwayii	1	S	1	10.3	1.08	1	2.27124
9	E. rodwayii	1	S	1	63.2	6.33	1	14.1721
9	E. rodwayii	1	S	1	15	1.75	1	3.68712
9	E. rodwayii	1	S	1	14.6	1.12	1	2.39914
9	E. rodwayii	1	S	1	62.3	4.72	1	10.6798
N1-3	E. gunnii	3	S	2	44.2	5	1	10.9105
N1-3	E. gunnii	3	S	2	52.1	5.23	1	11.5632
N1-3	E. subcrenulata	3	S	2	12.5	2.18	1	4.52937
N1-3	E. subcrenulata	3	S	2	27.4	5.23	1	11.0402
N1-3	E. vernicosa	3	S	2	63.2	6.61	1	14.7763		EXCLUDED - Extraordinary traits relative to other E. vernicosa. Believed to be data collection error.
N1-3	E. vernicosa	3	S	2	10.4	2.22	1	4.58196
N2-6	E. barberi	6	S	2	61.8	5.56	1	12.4796		Pot N2-6 - One plant died shortly following transplanting and was excluded.
N2-6	E. cordata	6	S	2	58.6	5.67	1	12.6453		These "early deaths" see also pots 76 and 88 are not included as they likely resulted from
N2-6	E. globulus	6	S	2	73.7	6.87	1	15.6028		transplant shock and not ecological interactions.
N2-6	E. ovata	6	S	2	65	6.07	1	13.6529
N2-6	E. viminalis	6	S	2	78.3	6.08	1	13.9844
N3-3	E. amygdalina	3	E	2	49.1	5.35	1	11.7544
N3-3	E. amygdalina	3	E	2	59.1	6.11	1	13.6015
N3-3	E. pulchella	3	E	2	38.6	2.87	1	6.32962
N3-3	E. pulchella	3	E	2	59	5.37	1	12.01
N3-3	E. risdonii	3	E	2	53.4	6.47	1	14.2363
N3-3	E. risdonii	3	E	2	31.6	2.41	1	5.26635
N4-6	E. amygdalina	6	E	2	35.6	4.19	1	9.04127
N4-6	E. coccifera	6	E	2	48.6	6.11	1	13.356		EXCLUDED
N4-6	E. delegatensis	6	E	2	45.2	4.49	1	9.85349
N4-6	E. obliqua	6	E	2	43.6	4.82	1	10.5185
N4-6	E. pauciflora	6	E	2	59.1	4.92	1	11.0456
N4-6	E. regnans	6	E	2	65	6.76	1	15.145
